# Supplementary material
Source: PubMed Central journal article supplement (PMC4453004)

**A**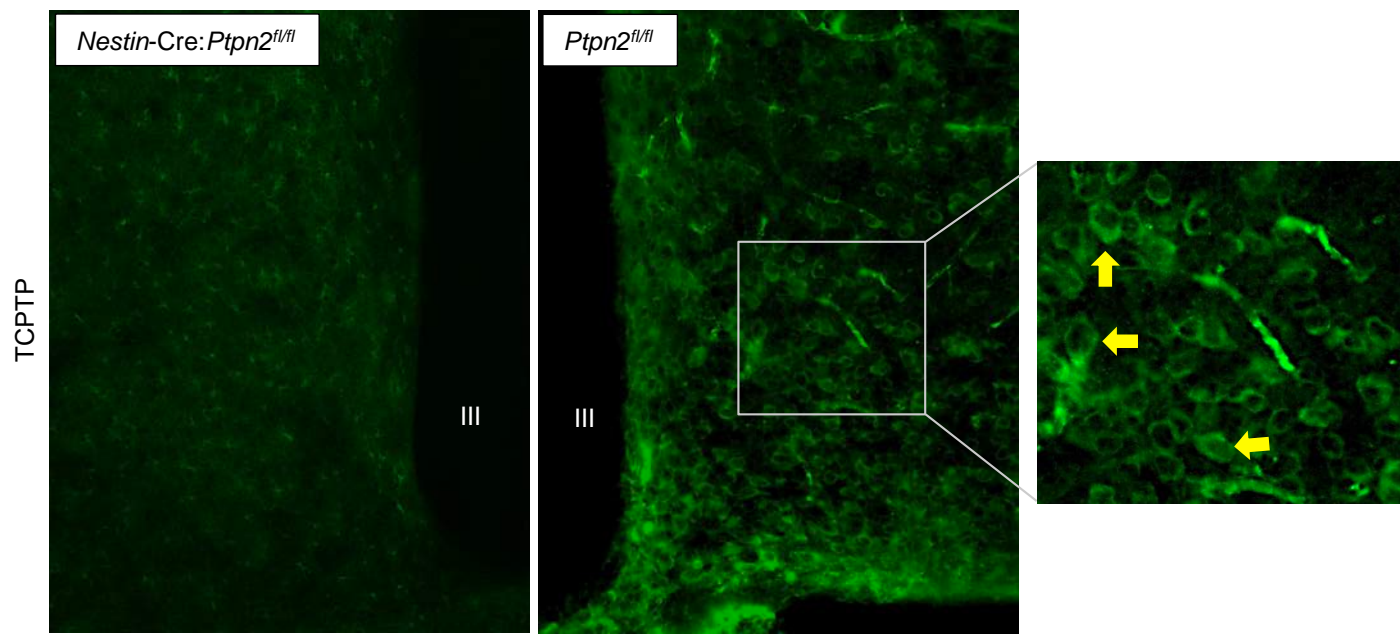**B**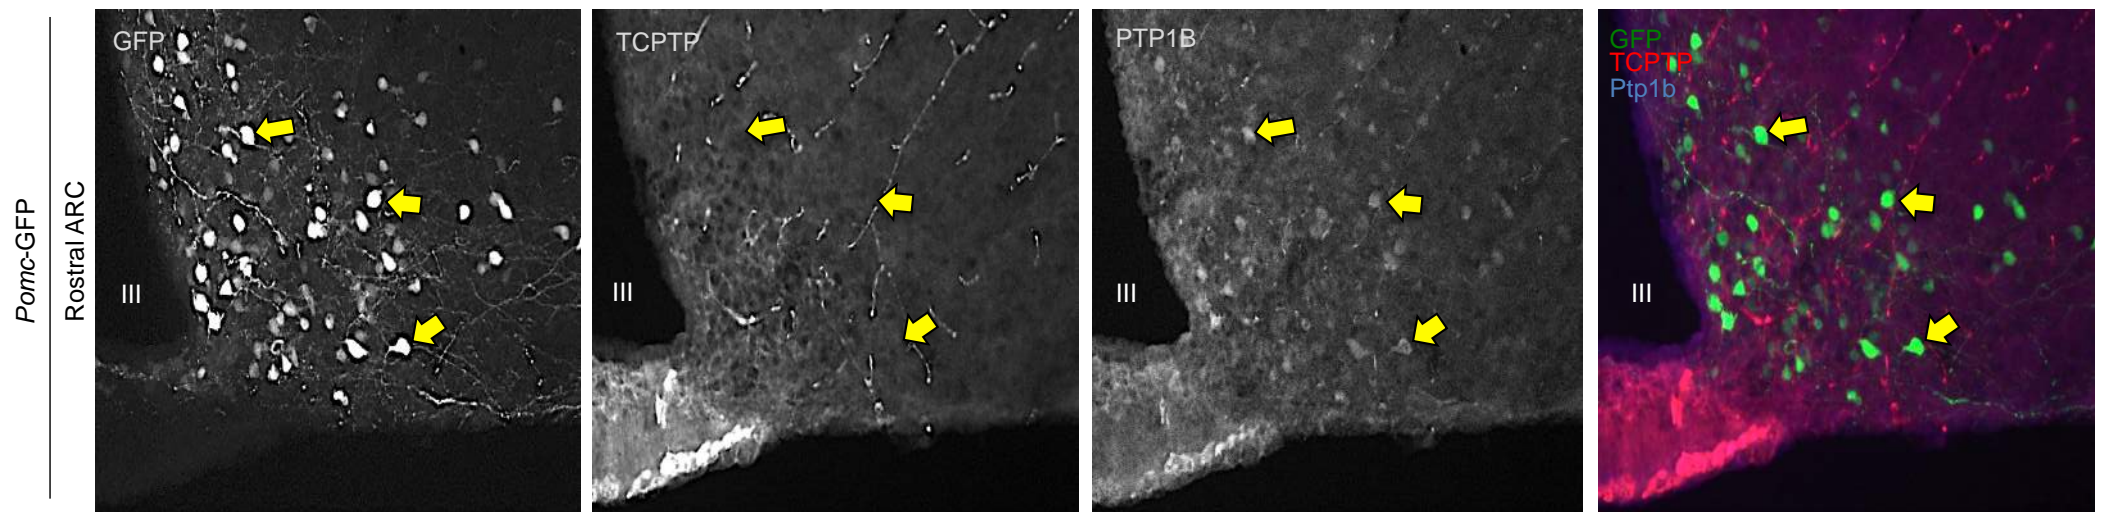**C**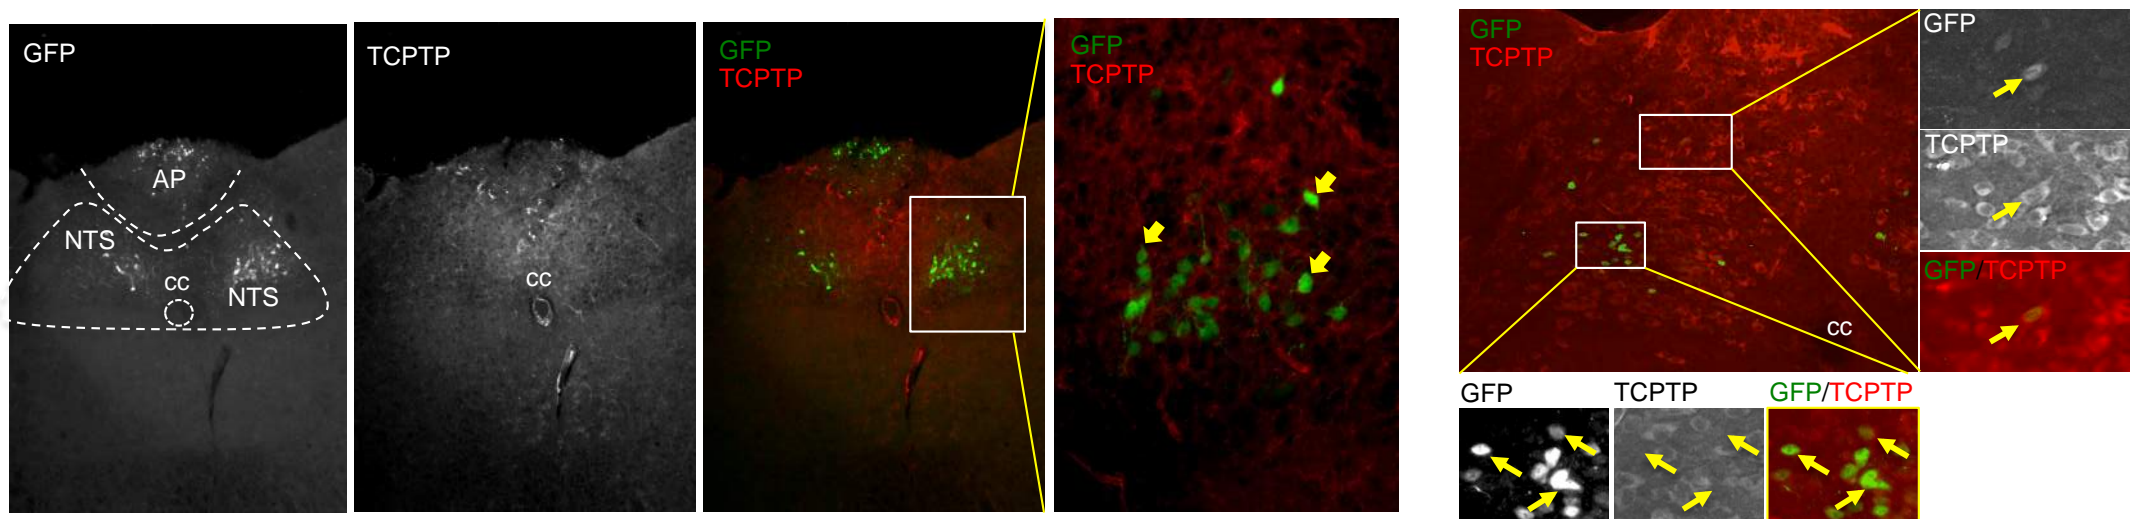**D**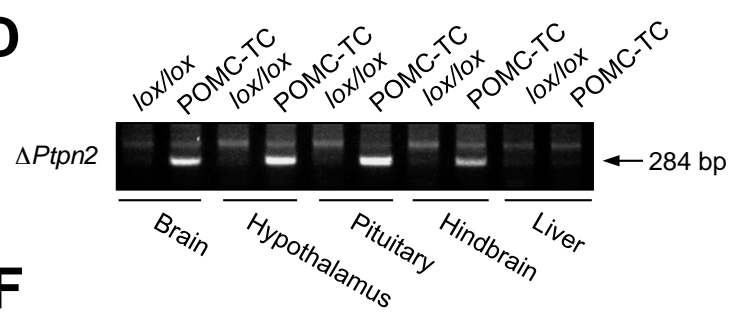**E**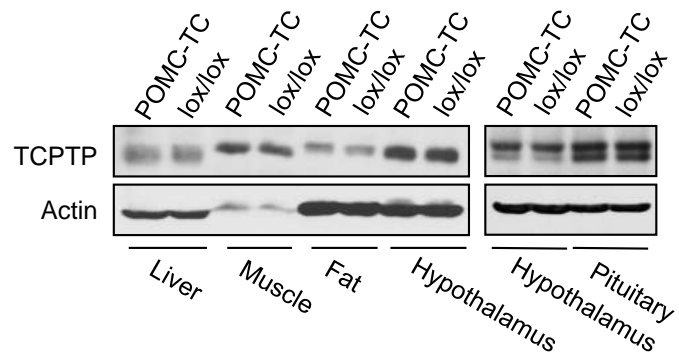**F**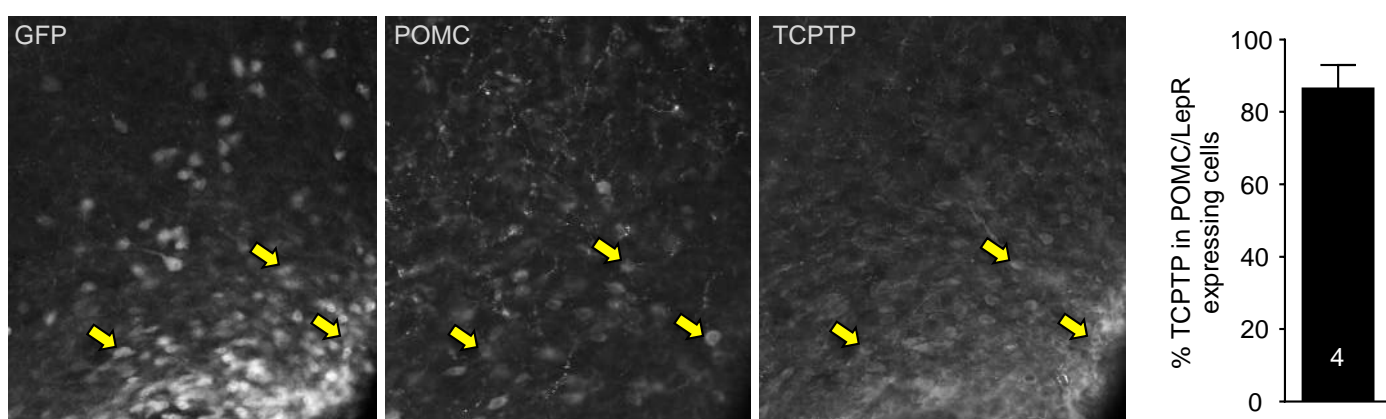



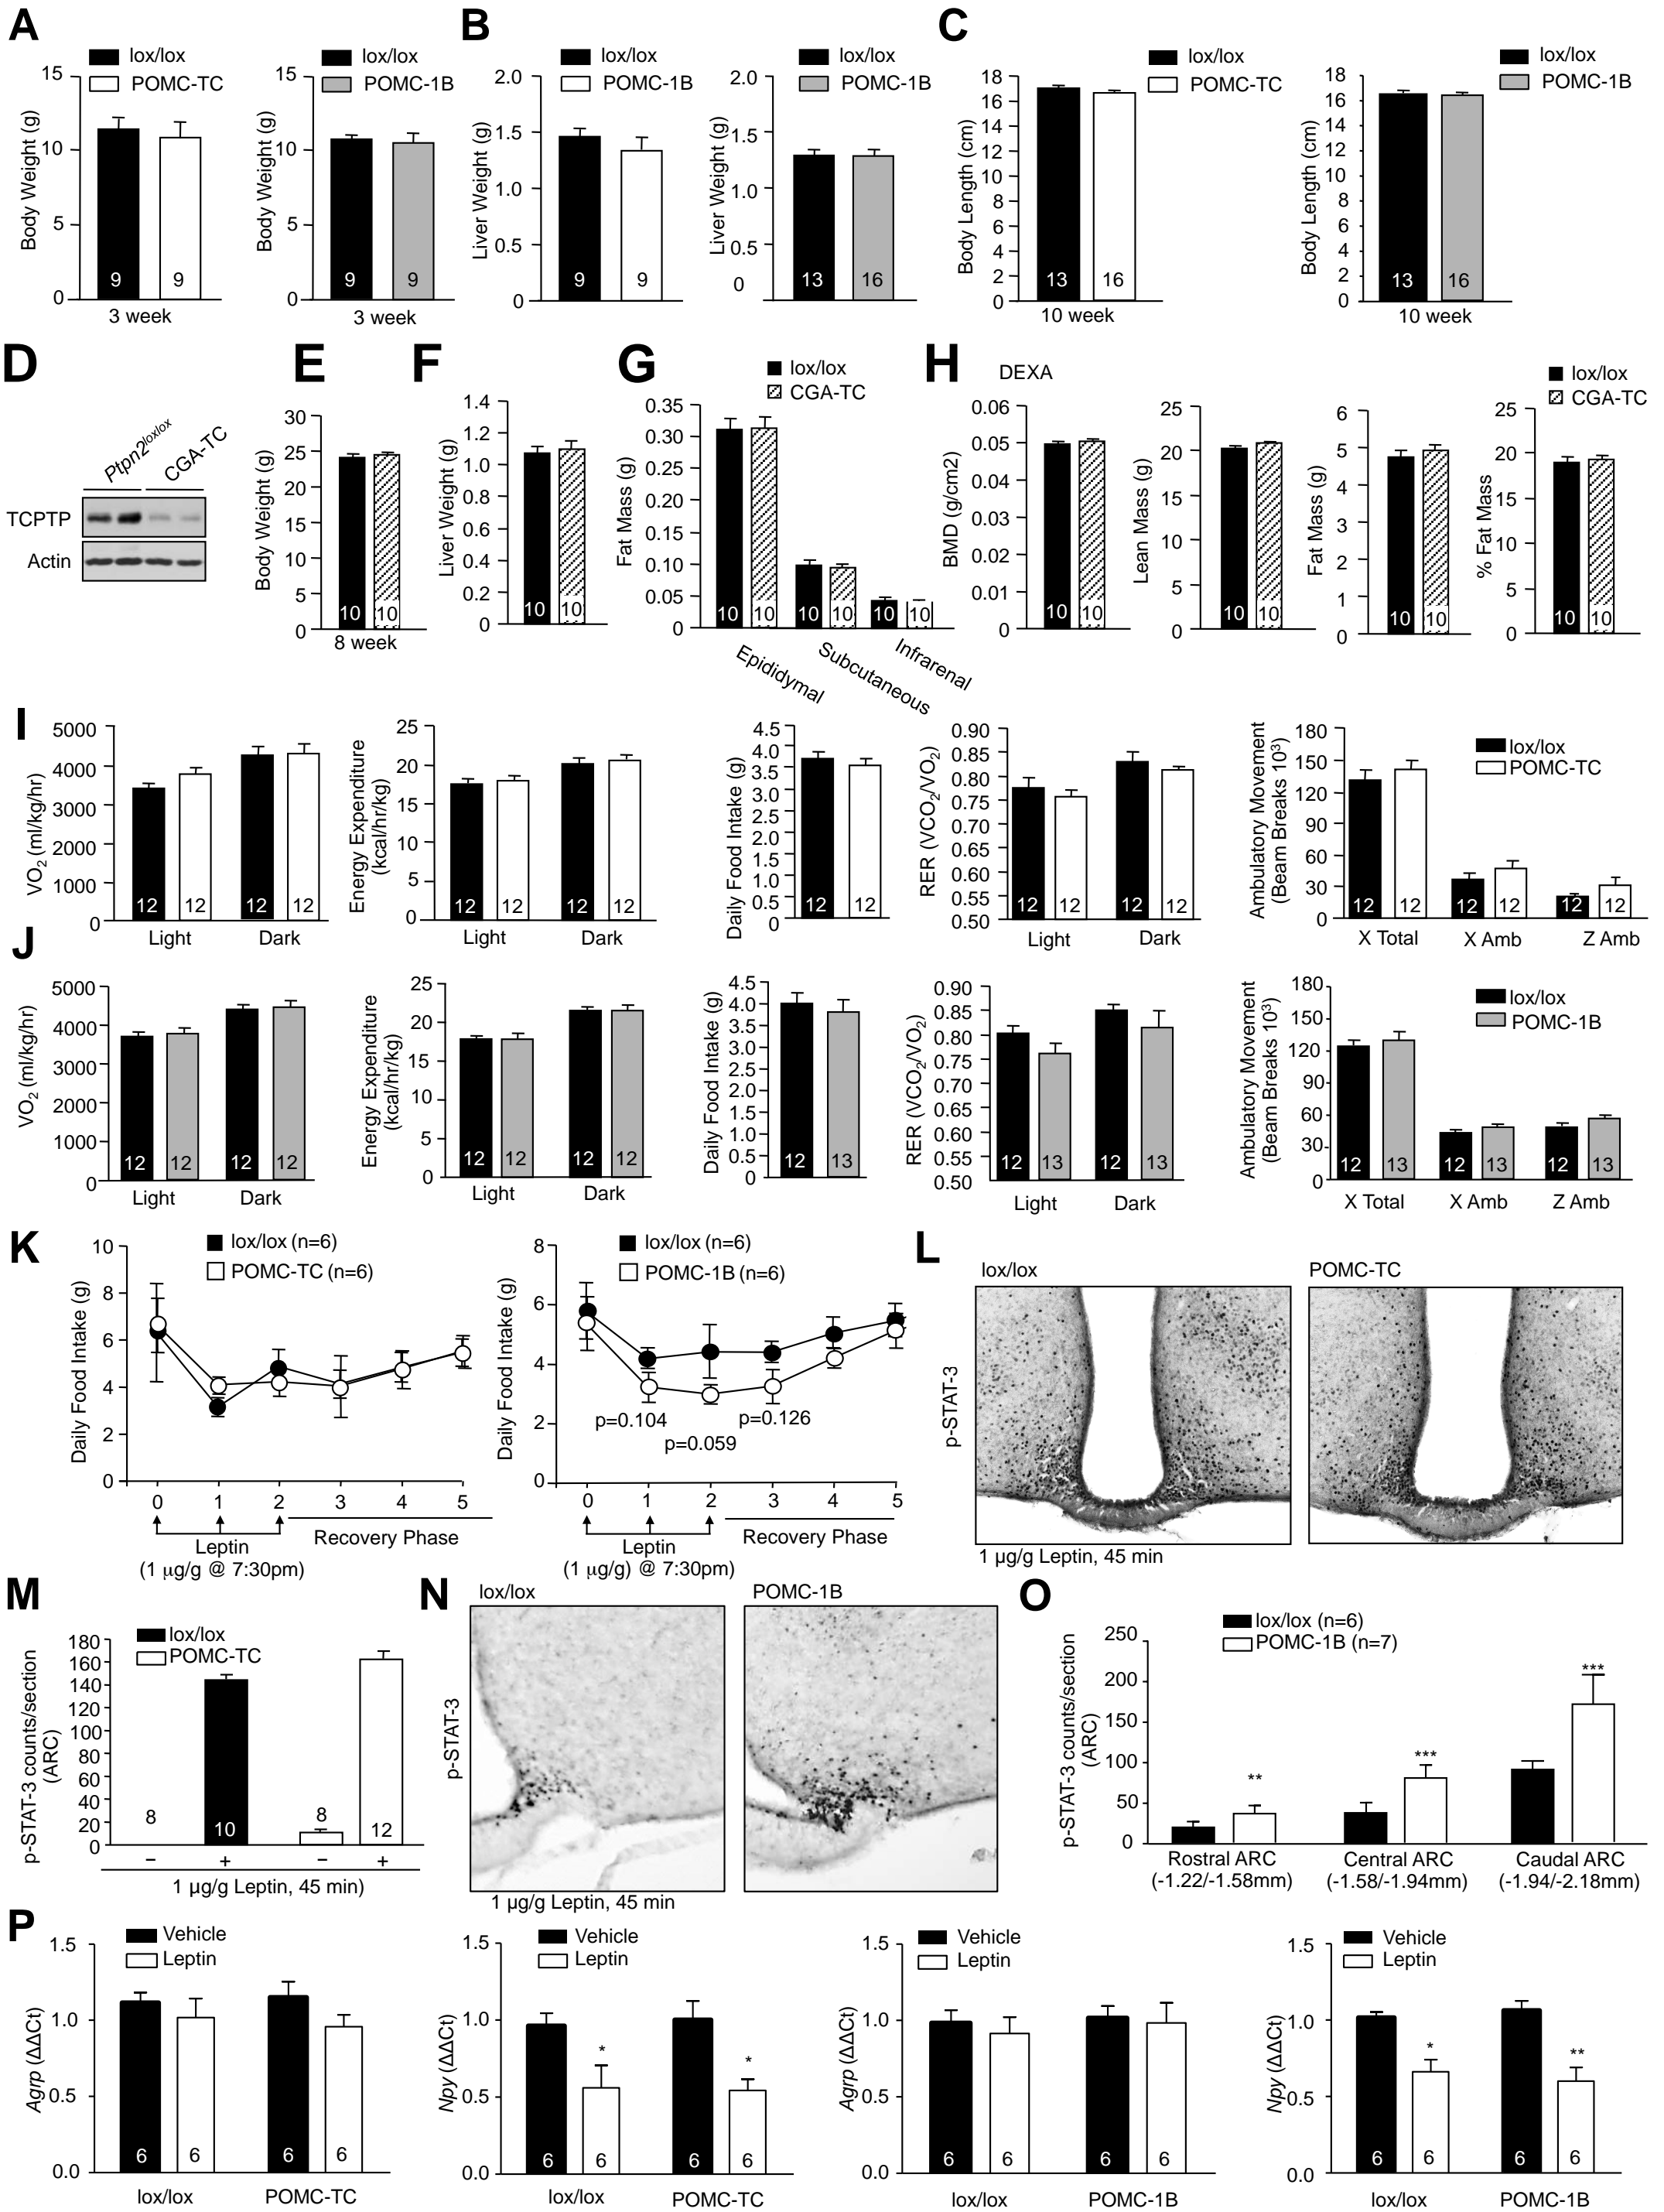

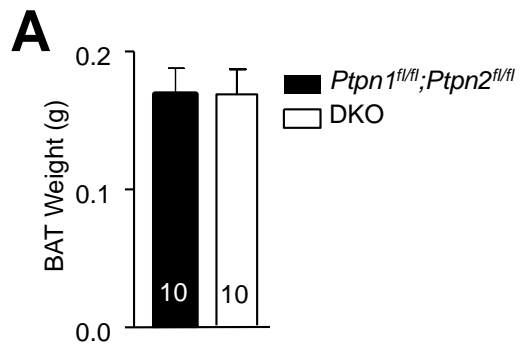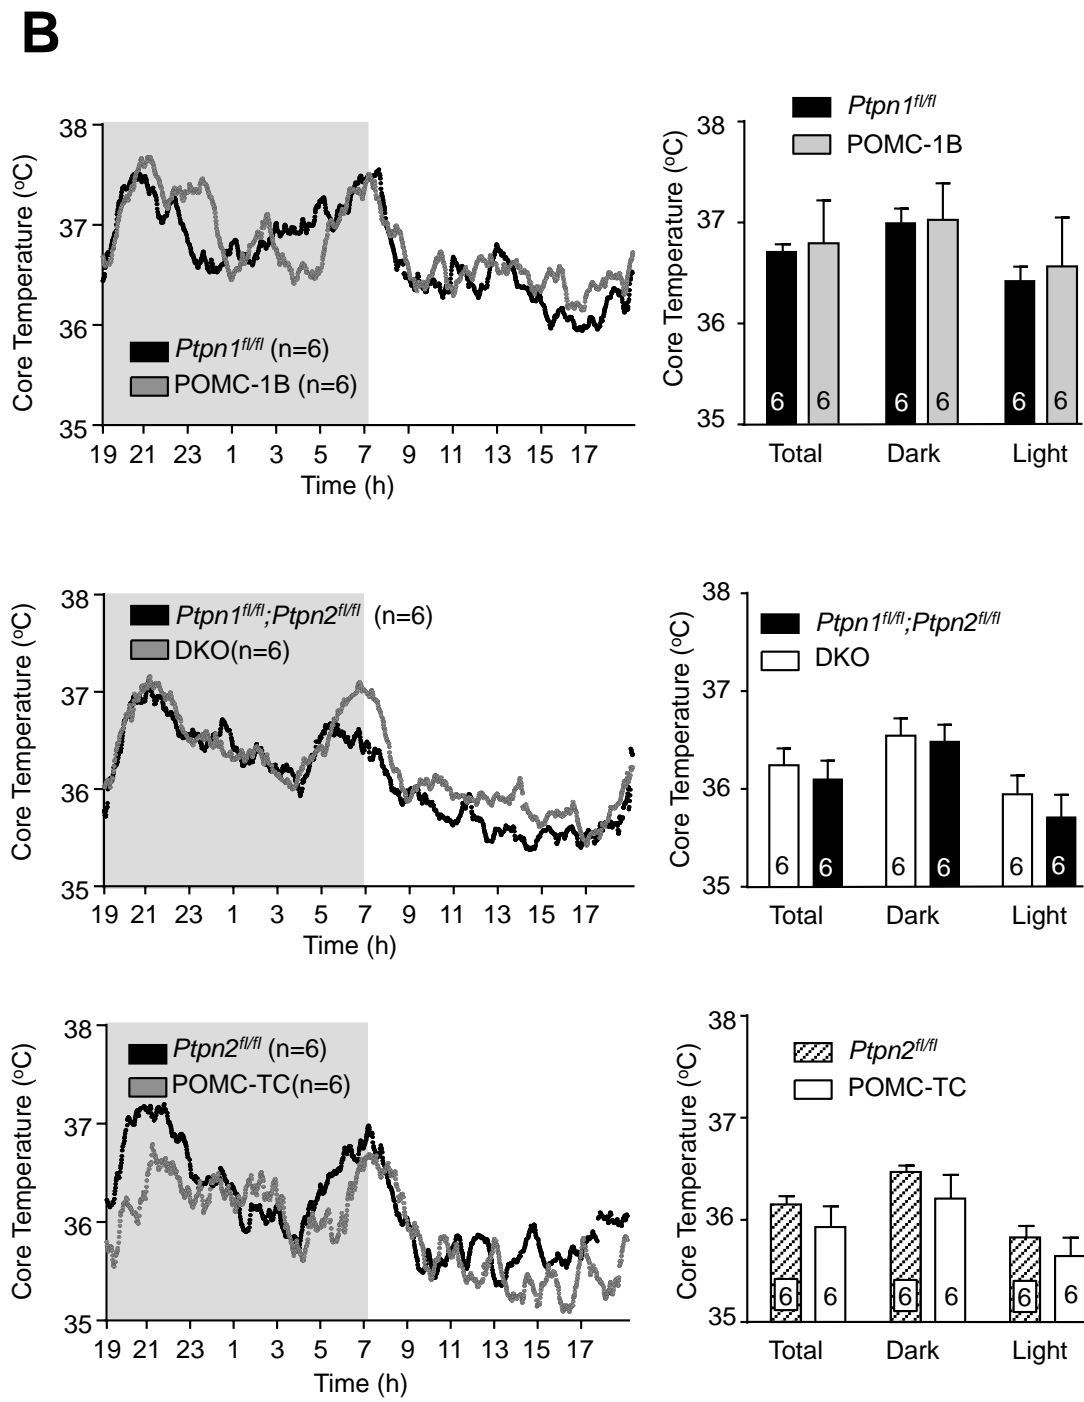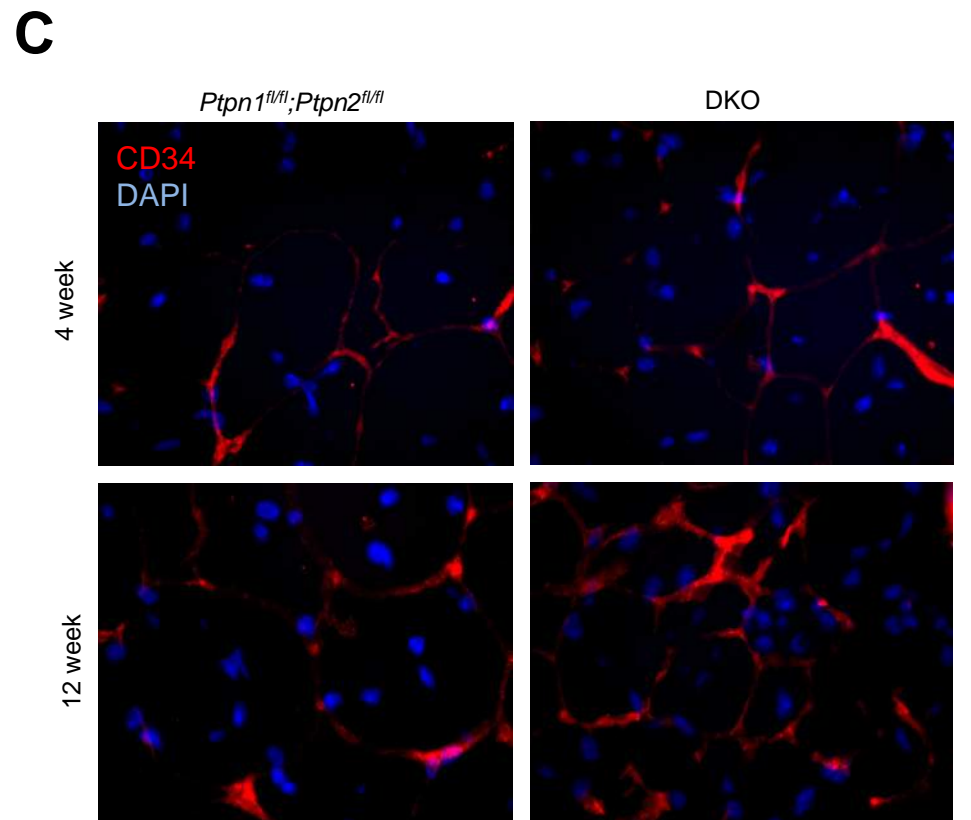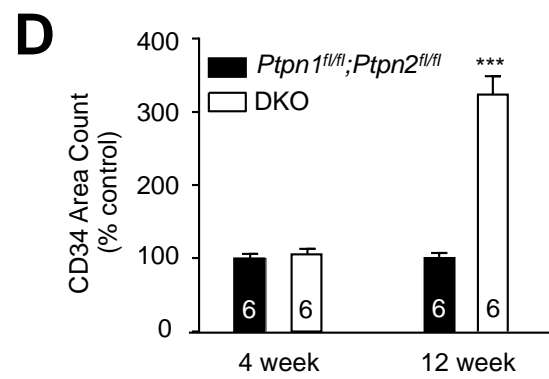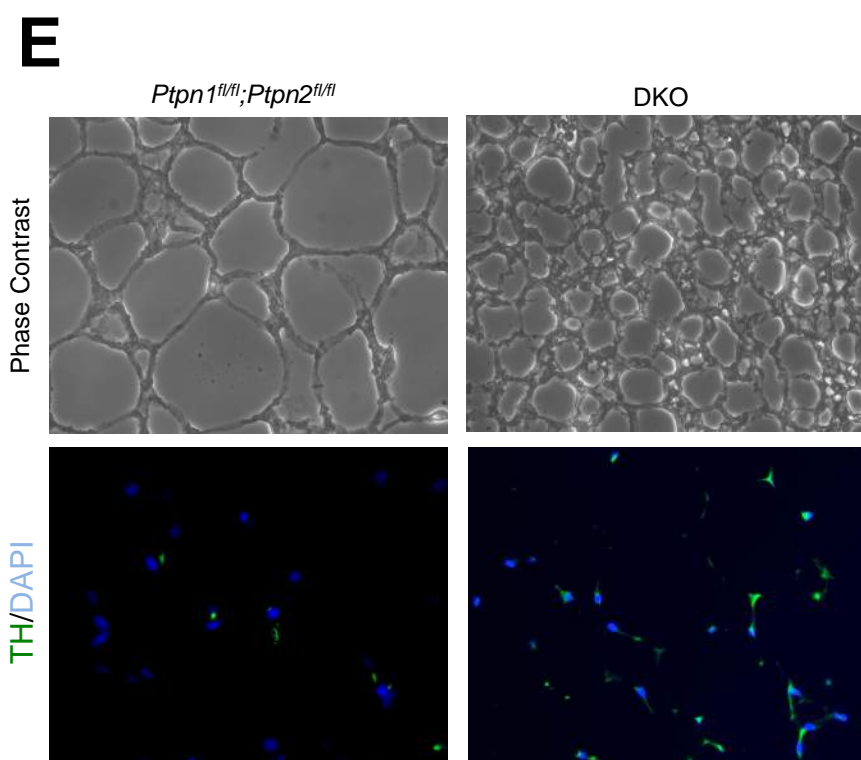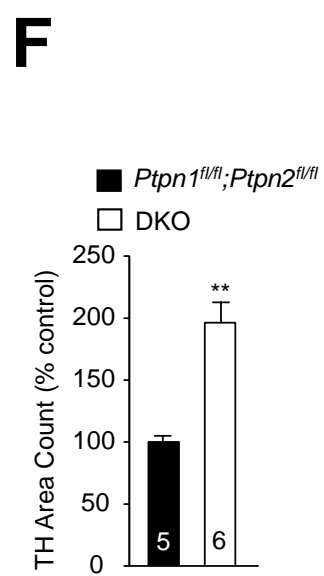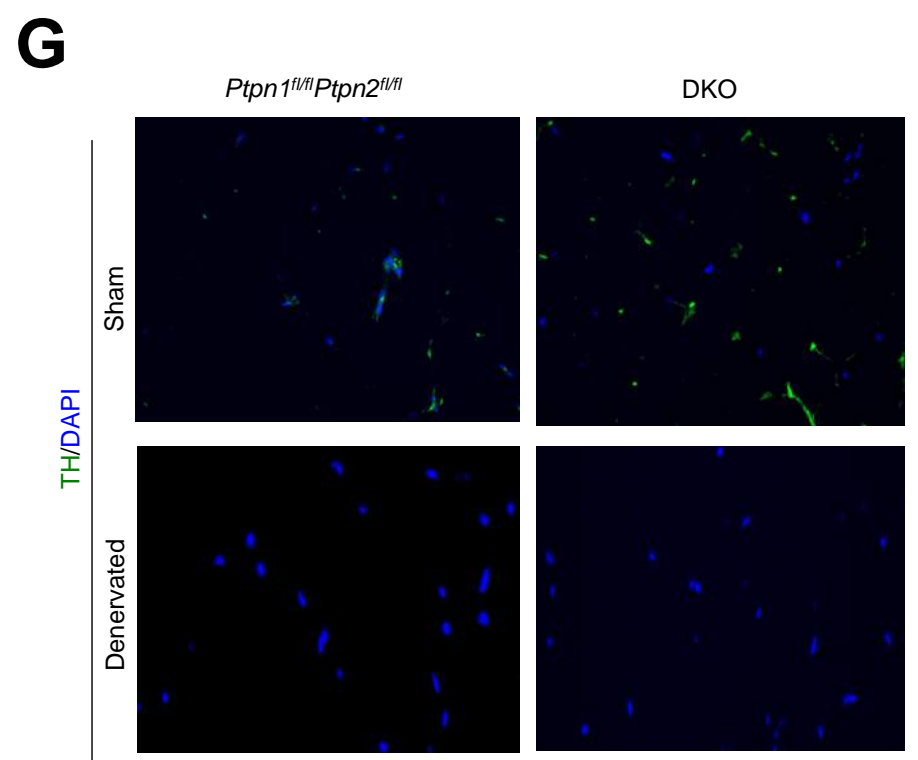



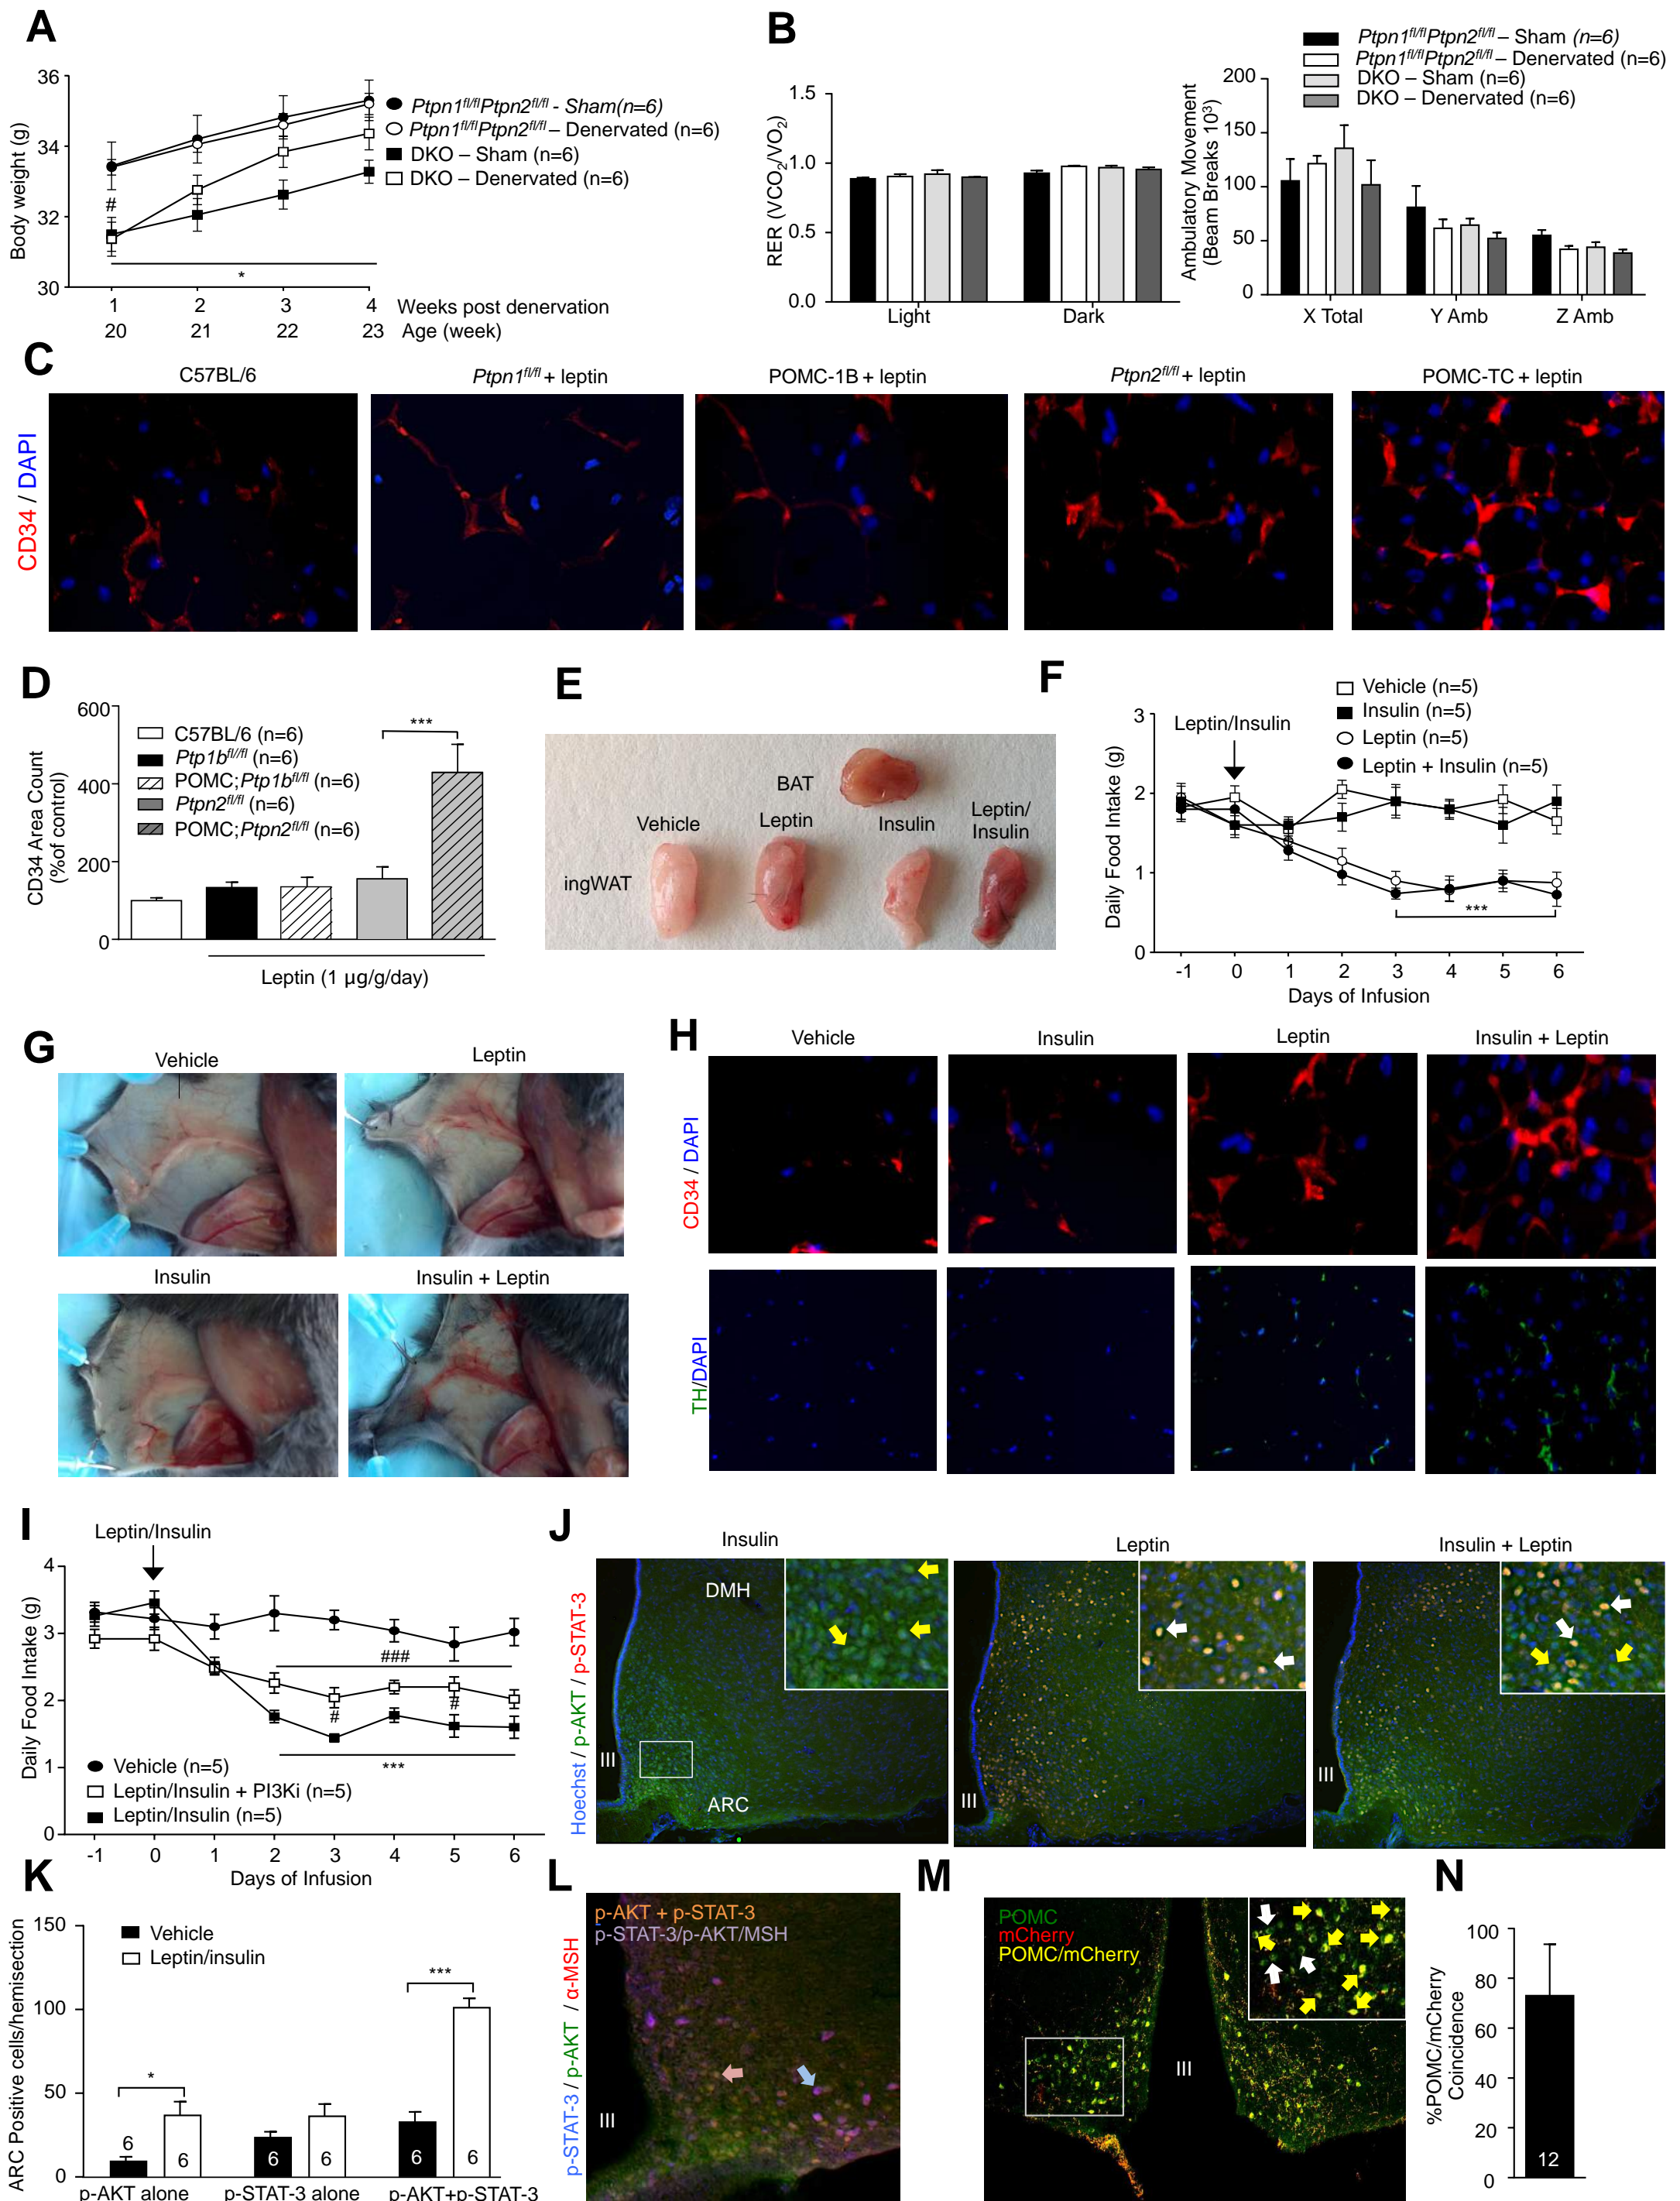

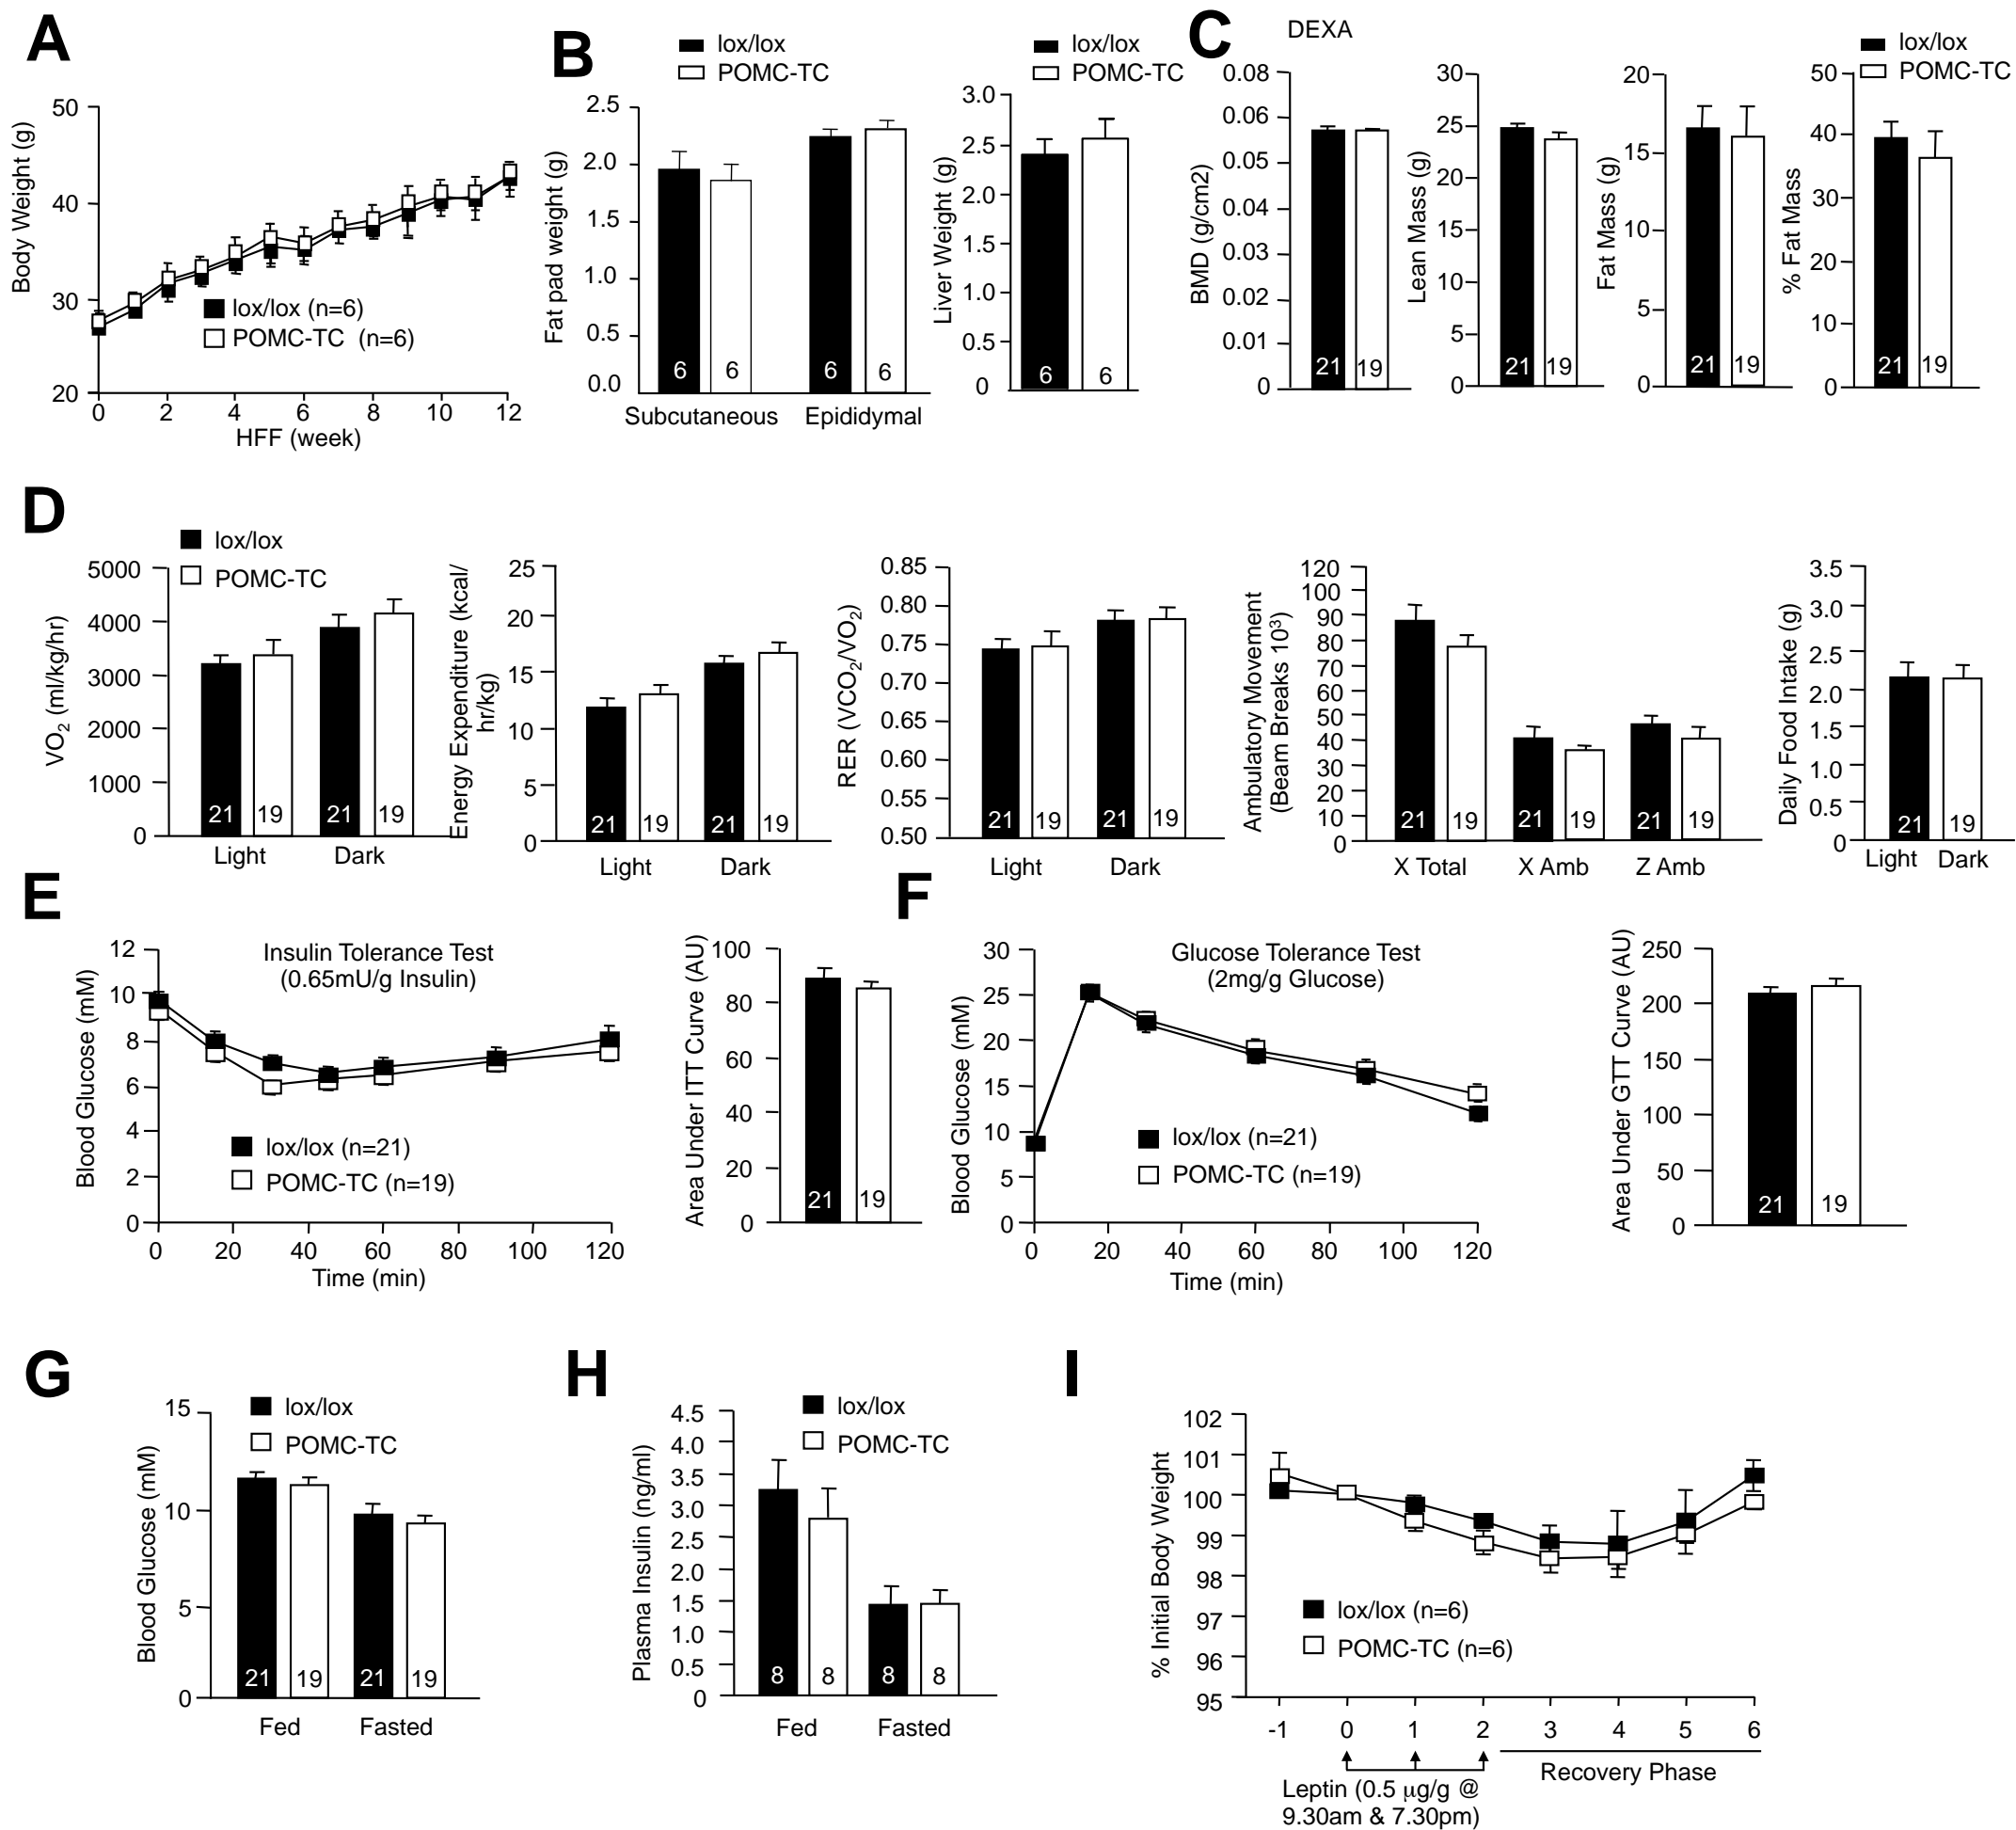

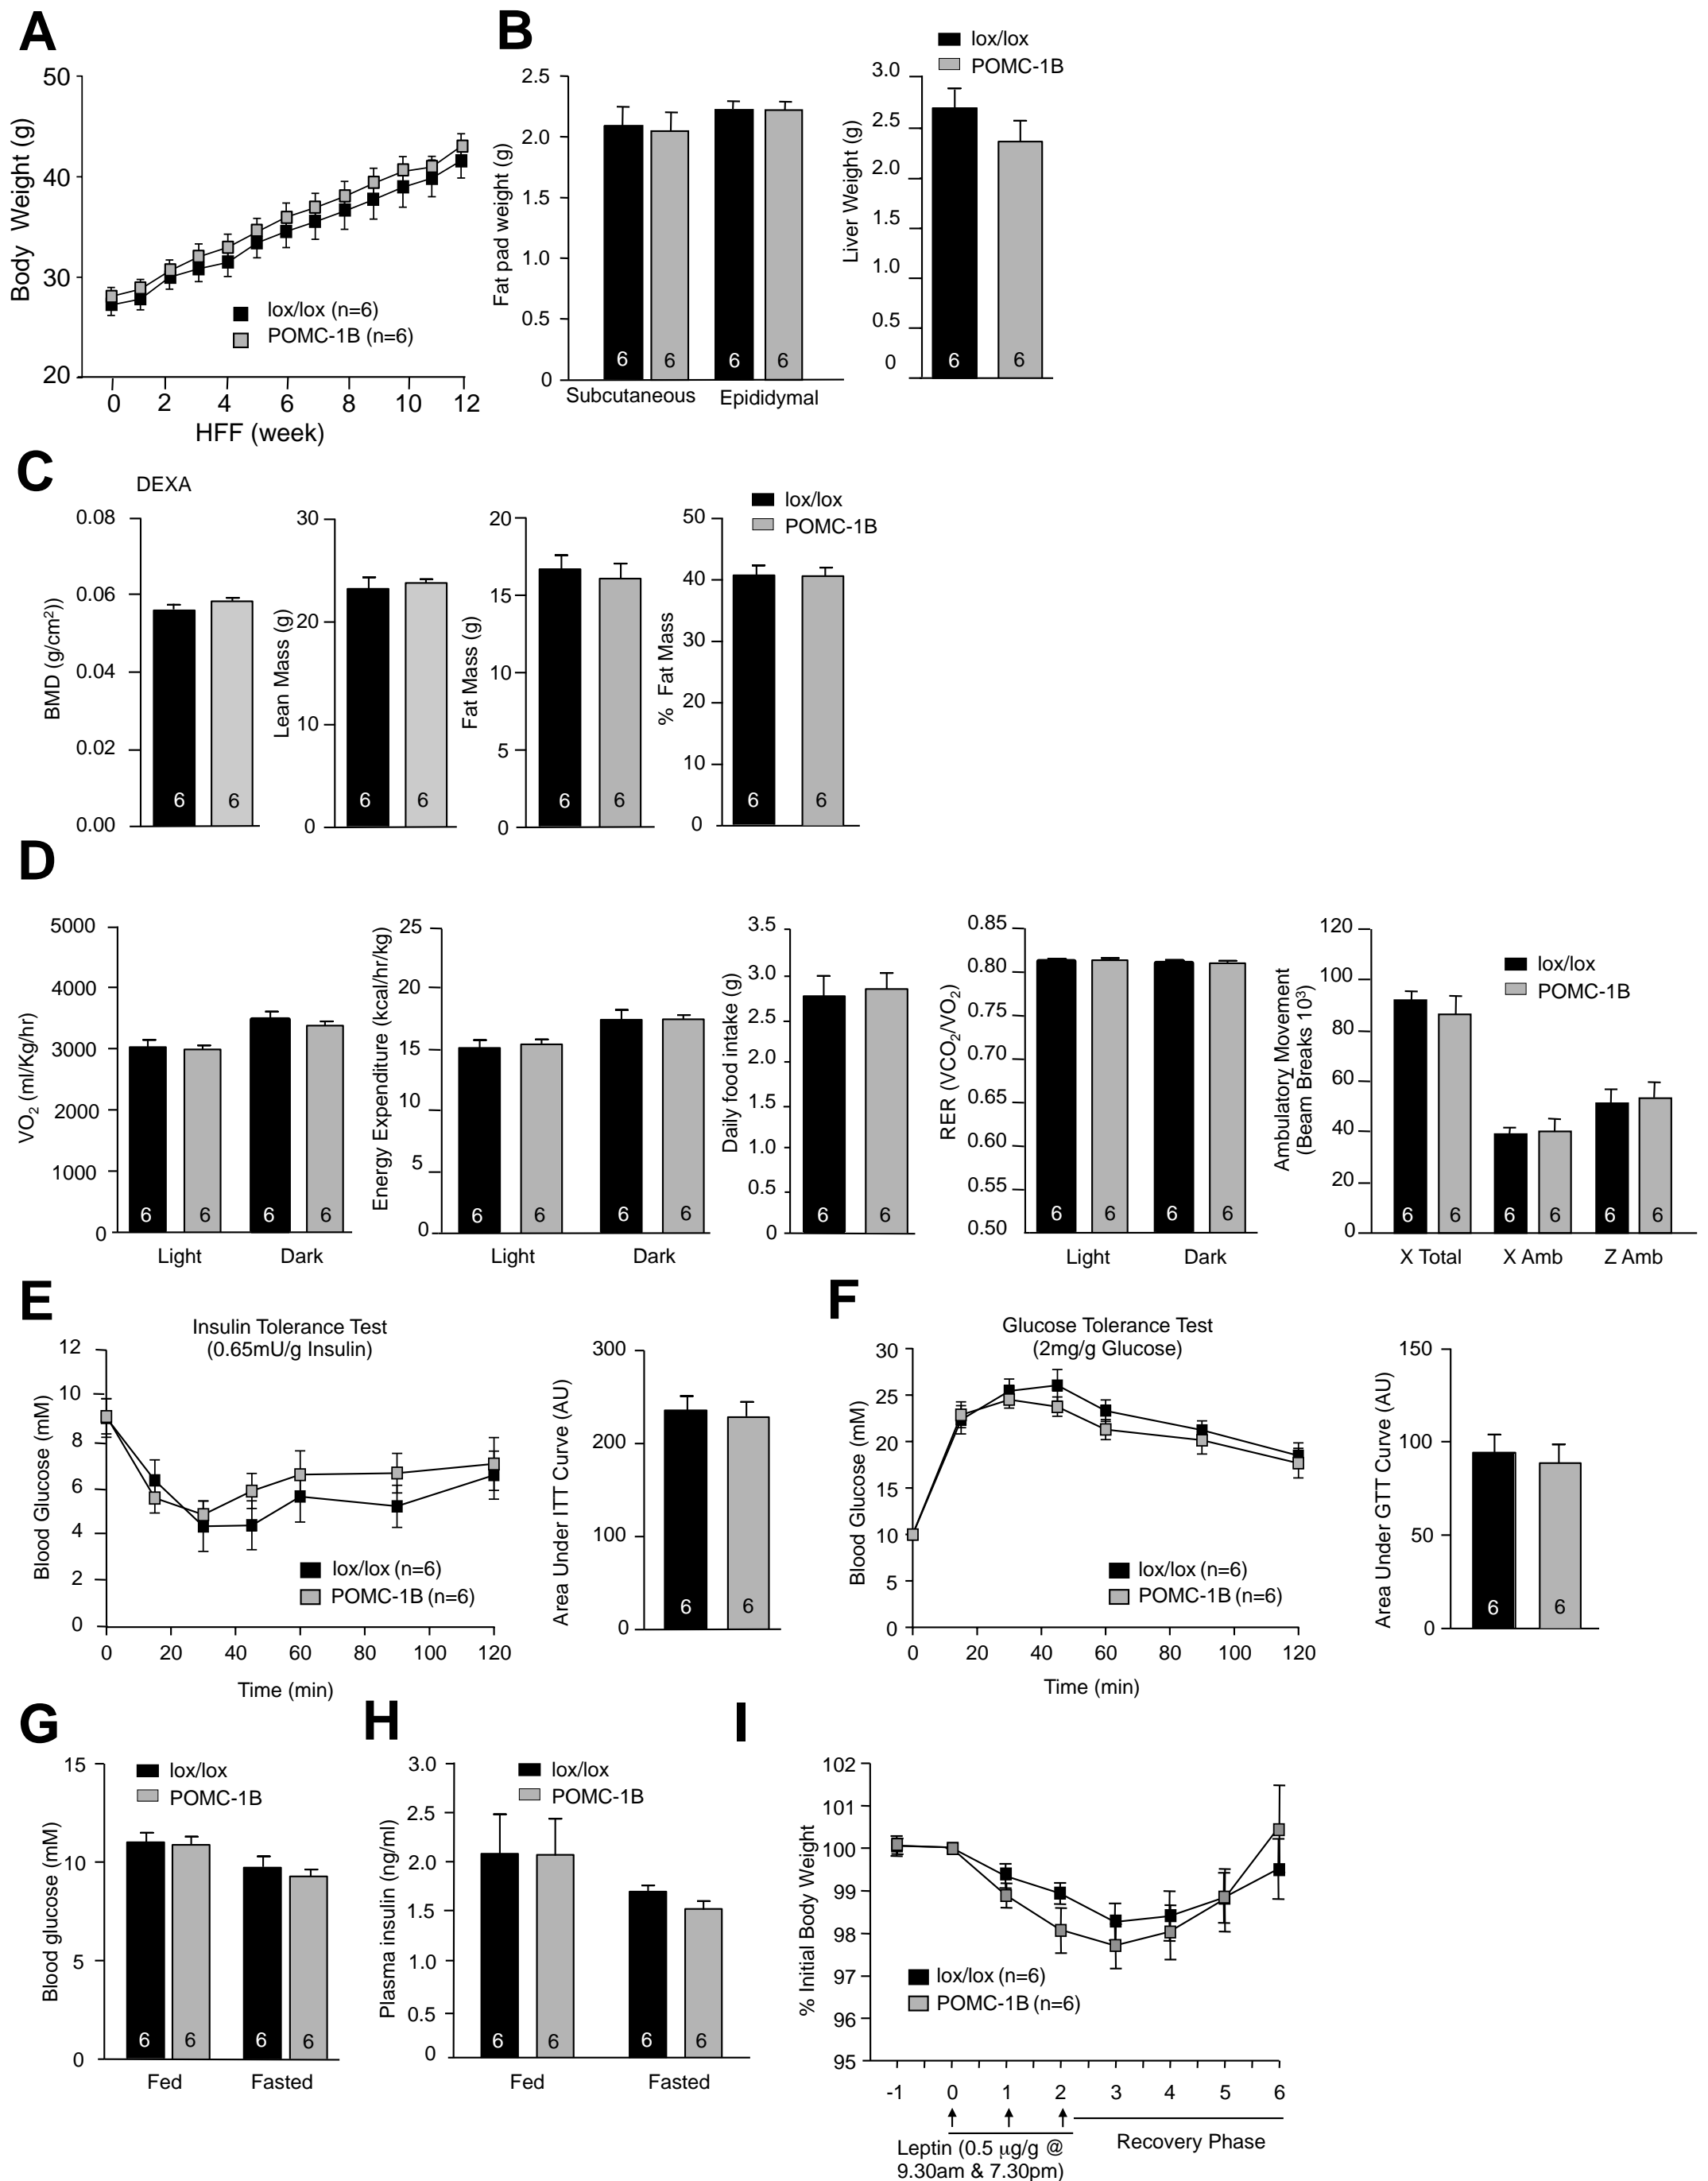



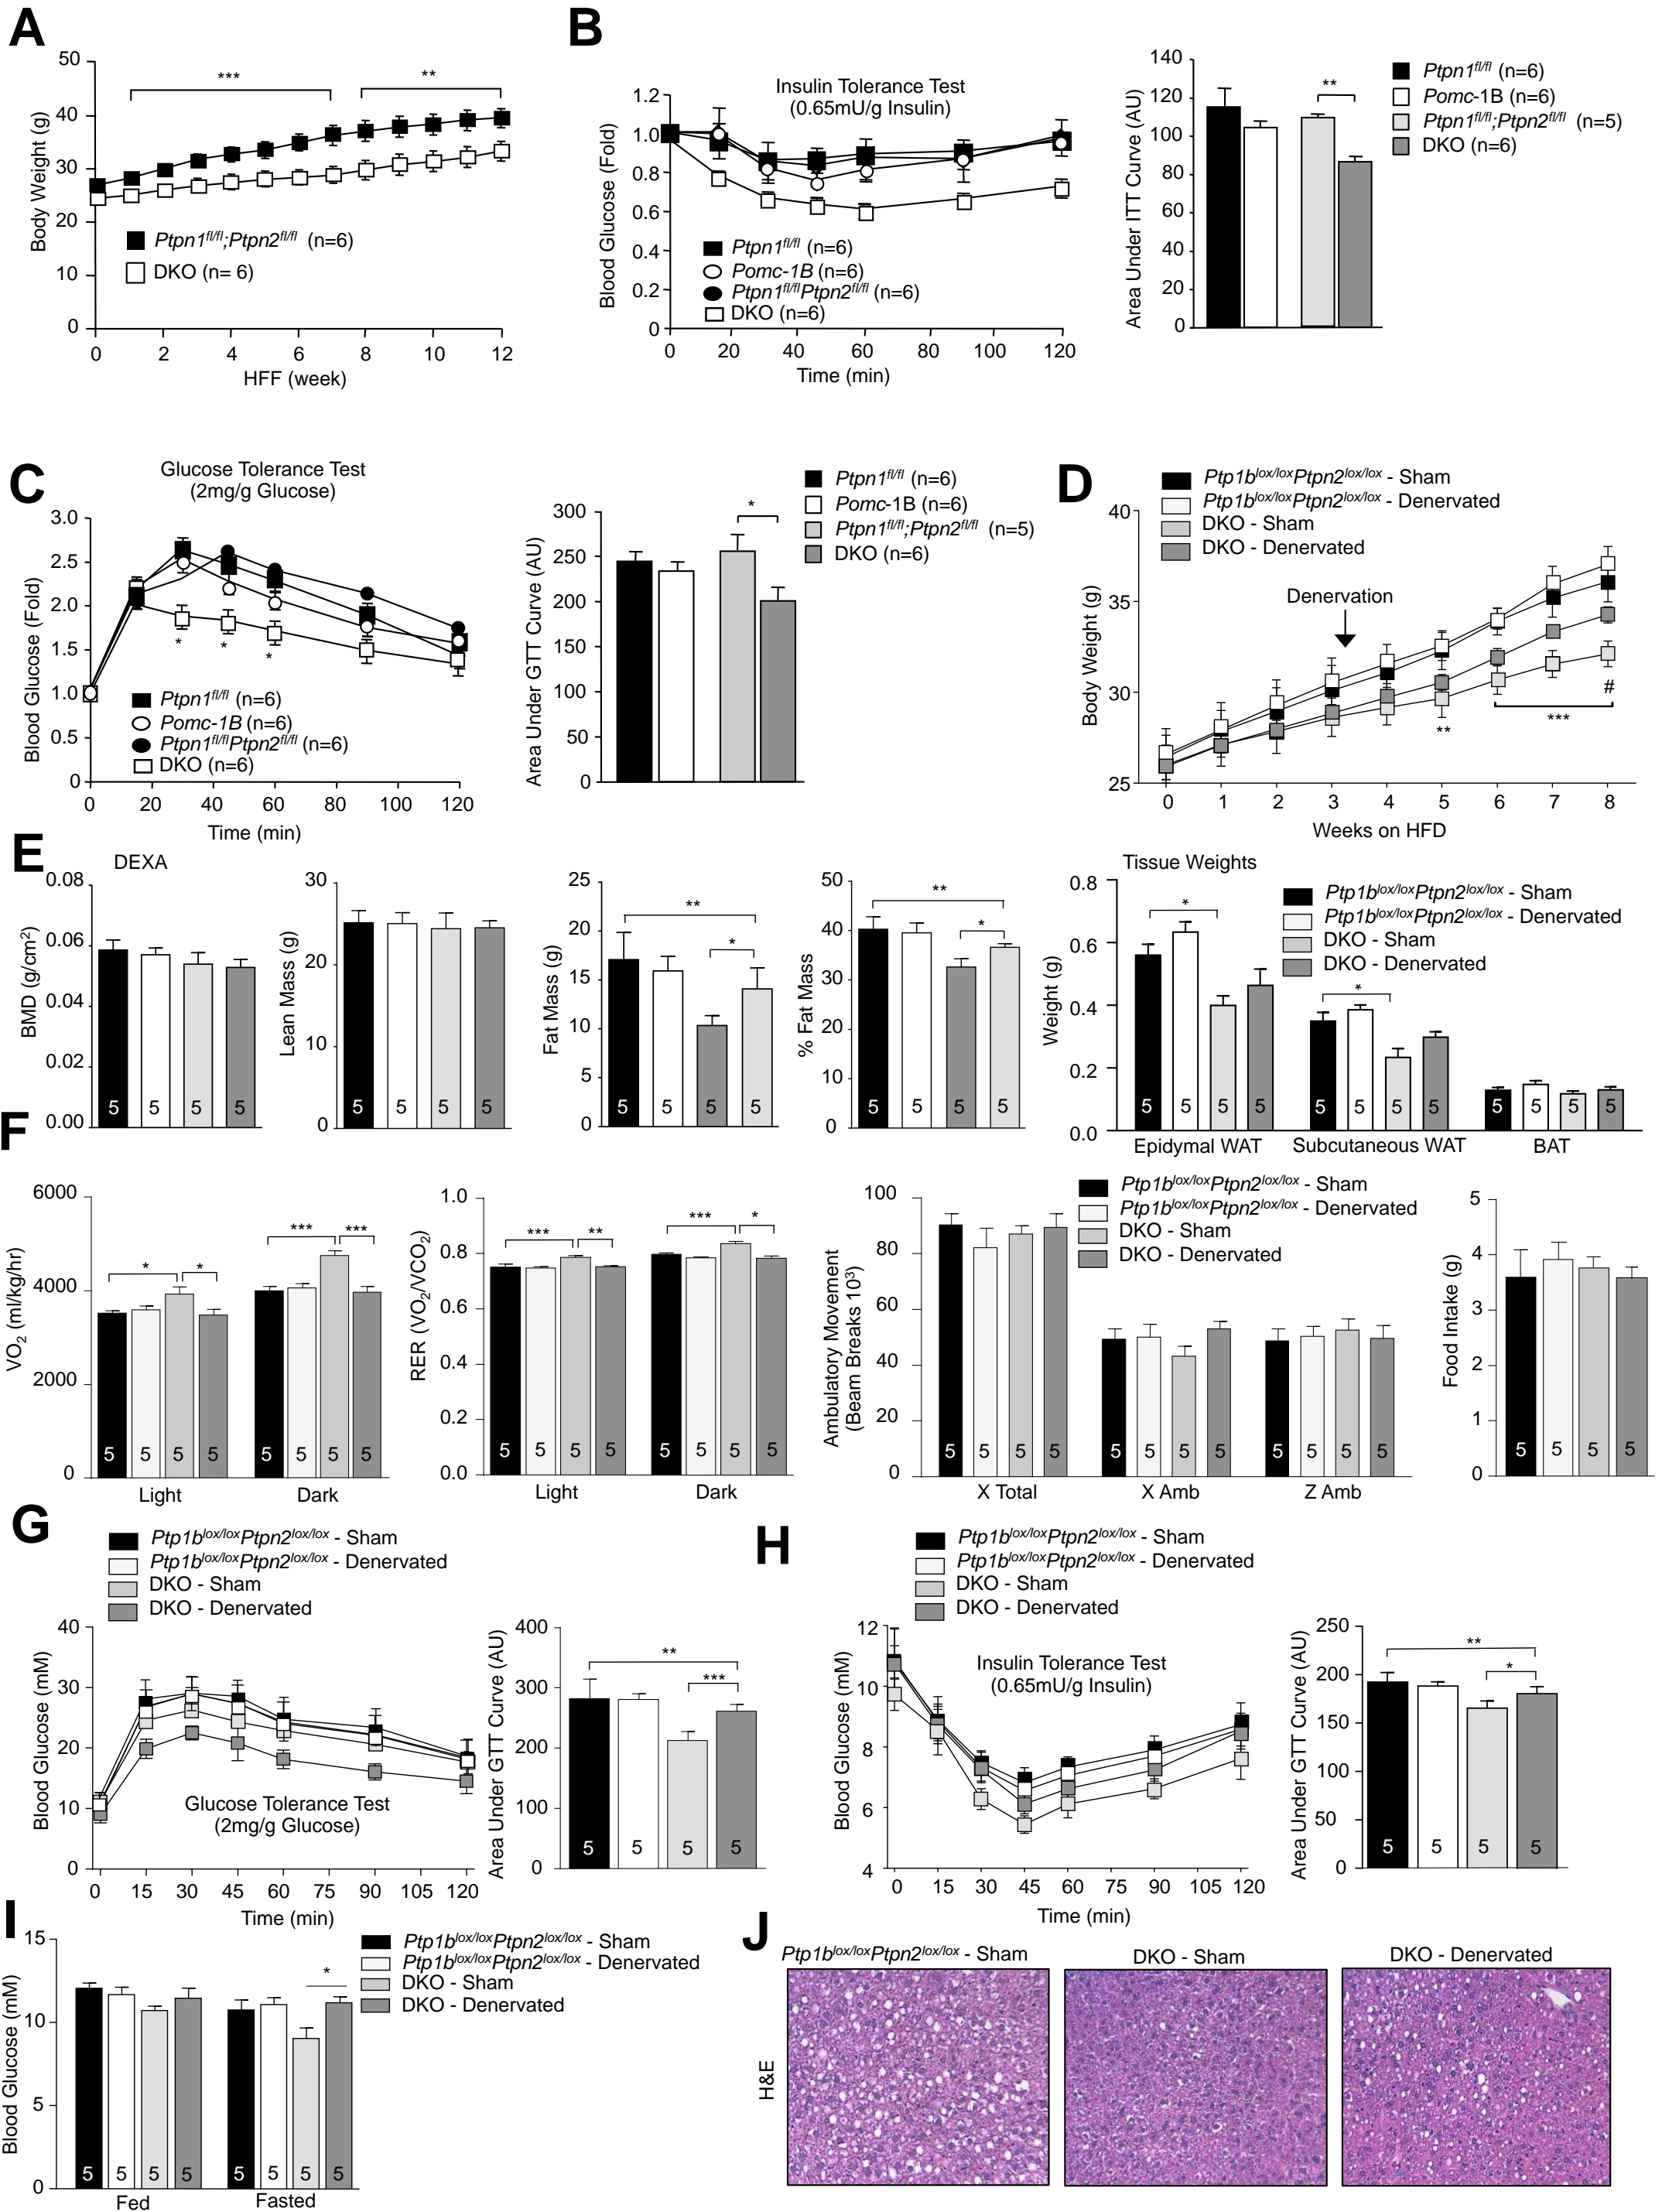

Supplement: NIHMS690850-supplement-Suppl_Figures.pdf [file NIHMS690850-supplement-Suppl_Figures.pdf]
